# Supplementary material
Source: Springer Nature journal article supplement (https://www.springermedizin.de/resource/supplementary/12955_2003_388_MOESM1_ESM.pdf/9560290)
Supplement: MOESM1 [file 9560290]

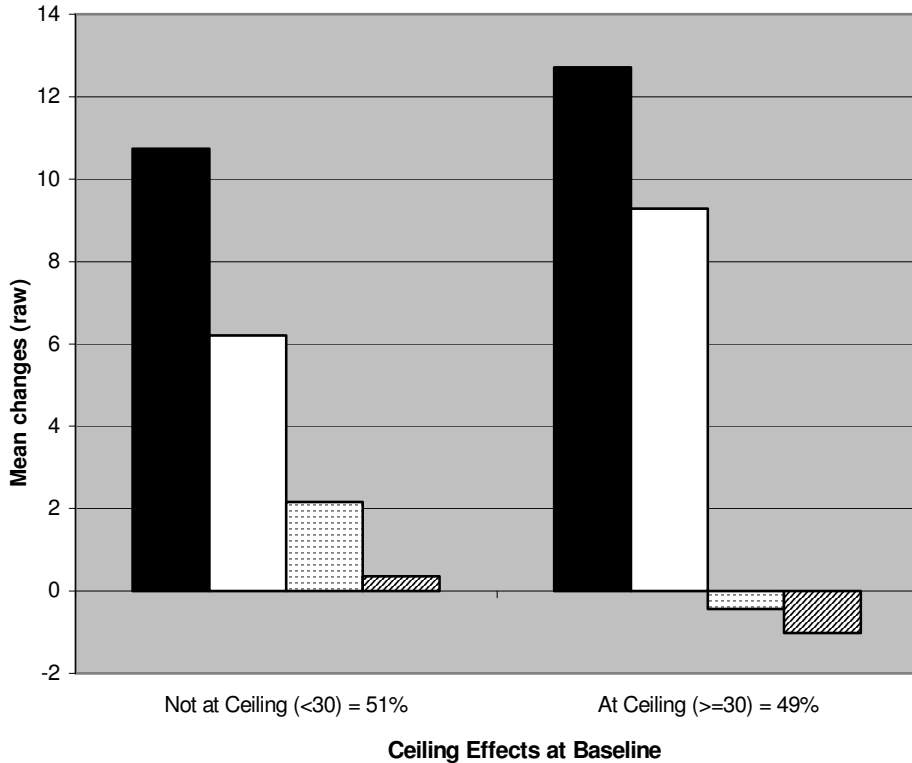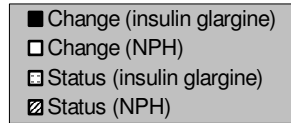

**Treatment**  
 $p < .0001$

**Ceiling**  
 NS

**Questionnaire**  
 $p < .0001$

---

**Treatment x Ceiling**  
 NS

**Treatment x Q're**  
 $p = .001$

**Ceiling x Q're**  
 $p < .0001$

**Treat. x Ceil. x Q're**  
 NS

---

N = 185
